# Supplementary material for: A comparative cost and qualitative analysis for the transportation of green energy carriers
Source: Royal Society of Chemistry journal article supplement (doi:10.1039/d4se00959b), 2025-01-01
Supplement: d4se00959b1.pdf [file d4se00959b1.pdf]

## Appendix I / Online Support Information (SI) file (if needed)

In Appendix I, Table A1 summarizes the eight GEC and their respective chemical properties. These values form the basis for the both p- & s-ETC frameworks.

**Table A1.** The chemical properties the selected GEC (NCBI, 2023c).

| GEC                                           | Abbr.           | Chemical Formula                                                      | Trans/<br>phase<br>p- or s- | Densities                 |                   |                    | Hydro.<br>wt. % | Liquid<br>Temp.<br>°C at 1 atm |
|-----------------------------------------------|-----------------|-----------------------------------------------------------------------|-----------------------------|---------------------------|-------------------|--------------------|-----------------|--------------------------------|
|                                               |                 |                                                                       |                             | mass<br>Kg/m <sup>3</sup> | m-Energy<br>MJ/kg | V-Energy<br>MJ/l   |                 |                                |
| <sup>1</sup> Hydrogen*                        | H <sub>2</sub>  | H <sub>2</sub>                                                        | p-<br>s-                    | g: 5.3<br>l: 71.0         | 120.0             | g: 0.6<br>l: 8.5   | 100.0           | -259 ↔ -253                    |
| <sup>1</sup> Methane                          | CH <sub>4</sub> | CH <sub>4</sub>                                                       | p-<br>s-                    | g: 82.6<br>l: 424.0       | 55.0              | g: 4.5<br>l: 23.2  | 25.0            | -183 ↔ -161                    |
| <sup>2</sup> Ammonia*                         | NH <sub>3</sub> | NH <sub>3</sub>                                                       | p-; s-                      | g: N.R.<br>l: 629.0       | 18.6              | g: N.R.<br>l: 11.7 | 17.8            | -78 ↔ -33                      |
| <sup>2</sup> Methanol                         | MeOH            | CH <sub>4</sub> O                                                     | p-; s-                      | g: N.R.<br>l: 792.0       | 19.9              | g: N.R.<br>l: 15.8 | 12.1            | -98 ↔ 65                       |
| <sup>2</sup> Ethanol                          | EtOH            | C <sub>2</sub> H <sub>6</sub> O                                       | p-; s-                      | g: N.R.<br>l: 789.0       | 26.8              | g: N.R.<br>l: 21.1 | 13.0            | -98 ↔ 65                       |
| <sup>3</sup> Toluene-<br>methylcyclohexane*   | TMCH            | a: C <sub>7</sub> H <sub>8</sub><br>b: C <sub>7</sub> H <sub>14</sub> | p-; s-                      | g: N.R.<br>l: 770.0       | 7.4               | g: N.R.<br>l: 5.7  | 15.5            | -126 ↔ 101                     |
| <sup>3</sup> Synthetic Paraffinic<br>Kerosene | SPK             | C <sub>8</sub> -C <sub>16</sub><br>Chains                             | p-; s-                      | g: N.R.<br>l: 757.0       | 44.1              | g: N.R.<br>l: 33.4 | 6.1             | -47 ↔ 176                      |
| <sup>3</sup> Formic Acid                      | FA              | CH <sub>2</sub> O <sub>2</sub>                                        | p-; s-                      | g: N.R.<br>l: 1220.0      | 5.5               | g: N.R.<br>l: 6.7  | 4.4             | 8 ↔ 101                        |

N.B. \* = framework backbone GEC; 1 = G1; 2 = G2; 3 = G3; Trans/phase = transport medium & phase designation; abbr. = abbreviations; Hydro. = Hydrogen; a = toluene; b = methylcyclohexane; m- = mass; V- = volumetric; g = gaseous phase; l = liquid phase; N.R. = not relevant.

## Appendix II

In Appendix II, we present the main equations used in our study. Equation 1.1 represents the ETC formula discussed in Section 2.2, which is essential for deriving the desired unit of output [M€/PJ]. Equation 1.2 shows the calculation for total annual costs. Equation 3 depicts the formula for annuitization, necessary to annuitize all non-yearly costs.

### Main Equations

$$ETC [M€/PJ] = \frac{TAC [€/yr]}{Q_{true} [kt/yr] \times EC_{GEC} [MJ/kg]}$$

$$TAC [M€/yr] = (AF [yr^{-1}] \times total\ CAPEX [M€]) + total\ OPEX [M€/yr] \quad (Eq.1.2)$$

**Table A2.** Pipeline parameters (ETSAP, 2011).

| Abbreviation/Symbol | Unit | Value | Definition |
|---------------------|------|-------|------------|
|---------------------|------|-------|------------|

## Appendix III

Here, we delineate the step-by-step equation pathway for calculating the pipeline framework, essential for solving Equation 1.1. We begin by computing the pipeline diameter (Eq. 4), leveraging the equation detailed by Baufumé et al., (2013) to derive the CAPEX per kilometer. The total CAPEX is then determined, factoring in the TD and annuitization using Eq. 3 from Appendix II, which considers pipeline lifetime and discount rates. Furthermore, Equations 6.1 and 6.2 specify the actual GEC throughput values for gas and oil pipelines, respectively. These equations account for pipeline utilization rates and loss factors, where each kilometer and CP-station contributes to overall efficiency losses. Lastly, equations 7 and 8 provide the methodology for calculating the total number of CP-stations required for a given TD, encompassing all relevant costs.

## Pipeline Equations for any chosen TD

$$D [m] = \sqrt{\frac{4 \times Q_{design} [kg/s]}{\rho [kg/m^3] \times v [m/s] \times \pi}} \quad D \geq 0.1$$

$$CAPEX [€/km] = 4\,000\,000D^2 + 598\,600D + 329\,000 \quad (Eq.5)$$

$$(Q_{true})_o [kt/yr] = Q_{design} [kt/yr] \times UR [\%/100] (1 - LF_o [\%/100km - CP_{station}])$$

**Table A3.** Pipeline parameters (ETSAP, 2011).

| Abbreviation/Symbol                         | Unit                             | Value                      | Definition                                 |
|---------------------------------------------|----------------------------------|----------------------------|--------------------------------------------|
| D                                           | m                                | -                          | Diameter                                   |
| $\rho$                                      | Kg/m <sup>3</sup>                | -                          | Mass Density                               |
| v                                           | m/s                              | -                          | Flow Speed                                 |
| CAPEX                                       | €/km                             | -                          | Pipeline Construction Cost per Km          |
| Q <sub>design</sub>                         | Kt/yr                            | -                          | Design GEC Throughput                      |
| UR                                          | [%/100]                          | -                          | Utilisation Rate                           |
| TD                                          | km                               | -                          | Transportation Distance                    |
| LF <sub>o</sub>                             | [%/100km-CP <sub>station</sub> ] | G2: 3.33E-5<br>G3: 1.00E-5 | Oil Loss Factor <sup>1</sup>               |
| LF <sub>g</sub>                             | [%/100km-CP <sub>station</sub> ] | G1: 1.50E-4                | Gas Loss Factor <sup>1</sup>               |
| n CP <sub>station</sub> <sup>parallel</sup> | integer                          | -                          | Number of parallel CP-stations             |
| Q <sub>daily</sub>                          | t/day                            | -                          | Daily GEC throughput                       |
| Q <sub>station</sub> <sup>Max</sup>         | t/day                            | -                          | Max CP-station throughput                  |
| n CP <sub>station</sub> <sup>total</sup>    | integer                          | -                          | Total number of CP-stations for a given TD |
| CP <sub>distance</sub> <sup>average</sup>   | km                               | -                          | Average distance between CP-stations       |

N.B. <sup>1</sup> = The loss factors are based on specific leakage and GEC usage values which can be found in SIII.

## Appendix IV

In this section, we present a detailed step-by-step guide outlining the calculation process for shipping, which is essential for computing the ETC values for selected GECs (Eq. 1.1, Appendix II). The sequence begins with Equation 9, determining the total roundtrip time of a ship, a crucial parameter for calculating the true GEC throughput per chosen TD (Eq. 10). Next, Equation 11 converts the GEC

throughput per trip to a yearly rate, aligning with the timeframe of our study. Equations 12.1 and 12.2 constitute the core calculations to obtain the true GEC throughput required for Equation 1.1 (Appendix II). While Equation 11.1 is straightforward, Equation 11.2 involves additional steps to reach the desired value. Subsequent formulas (Eq. 13.1, 13.2, and 13.3) account for various losses such as boil-off and flash rates, with Equation 13.3 incorporating storage parameters to determine minimal GEC storage requirements before local distribution. Cost considerations are addressed through Equations 14.1, 14.2, and 14.3, where integer outputs reflect the operational constraints such as the absence of half ships and terminals. Importantly, the number of ships influences the  $Q_{true}$  in Equation 9, which is pivotal for subsequent calculations where the ship's GEC storage capacity determines the rate-limiting step.

On the following page, Table A4 provides further clarification on abbreviations and units used, while detailed cost data can be found in SIV

### Shipping Equations for any chosen TD

$$TRT [day] = \frac{TD[km]}{12v[m/s]} + t_{load}[day] + t_{unload}[day] \quad (Eq.9)$$

$$Q_{true} [t] = \frac{Q_{prod.} [t / day] \times TRT [day]}{n \text{ ship}} \quad (Eq.10)$$

$$ATF [yr^{-1}] = \frac{365 [day] \times UR [\%/100]}{TRT [day]} \quad (Eq.11)$$

$$(Q_{annual})_o [t/yr] = Q_{true} [t] \times ATF [yr^{-1}] \quad (Eq.12.1)$$

$$(Q_{annual})_g [t/yr] = (((Q_{true} [t] - L_{exp} [t]) - L_{ship} [t]) - L_{imp} [t]) \times ATF [yr^{-1}] \quad (Eq.12.2)$$

$$L_{exp} [t] = Q_{true} [t] \times L_{boil}^{export} [\%/100day] \times (TRT [day]) + Q_{true} [t] \times L_{flash}^{export} [\%/100Q_{true}] \quad (Eq.13.1)$$

$$L_{ship} [t] = Q_{true}^* [t] \times L_{boil}^{ship} [\%/100day] \times (t_{transport} [day]) + Q_{true}^* [t]$$

$$L_{imp} [t] = Q_{true}^{**} [t] \times L_{boil}^{import} [\%/100day] \times (t_{unload} [day] + t_{storage} [day]) \quad (Eq.13.3)$$

$$n \text{ export} [int] = \frac{Q_{true} [t]}{Cap_{terminal}^{export} [t]} \quad ;if \ Q_{true} > Cap_{terminal}^{export} \rightarrow n + 1 \quad (Eq.14.1)$$

$$n \text{ ship} [int] = \frac{Q_{true}^* [t]}{Cap_{storage}^{ship} [t]} \quad ;if \ Q_{true}^* > Cap_{storage}^{ship} \rightarrow n + 1 \quad (Eq.14.2)$$

$$n \text{ import} [int] = \frac{Q_{true}^{**} [t] + (Q_{true}^{**} [t] \times \frac{20 [day]}{TRT [day] \times n \text{ ships}})}{Cap_{terminal}^{import} [t]} \quad ;if \ Q_{true}^{**} > Cap_{terminal}^{import} \rightarrow n$$

**Table A4.** Shipping parameters (SIV).

| <b>Abbreviation/Symbol</b> | <b>Unit</b>                   | <b>Description</b>                           |
|----------------------------|-------------------------------|----------------------------------------------|
| TRT                        | <b>day</b>                    | Total Roundtrip Time                         |
| TD                         | <b>km</b>                     | Transport Distance                           |
| $v$                        | <b>Km/h</b>                   | Ship Speed                                   |
| $t_{load}$                 | <b>day</b>                    | Loading time                                 |
| $t_{unload}$               | <b>day</b>                    | Unloading time                               |
| $Q_{true}$                 | <b>t</b>                      | True GEC throughput                          |
| $Q_{prod.}$                | <b>t/day</b>                  | GEC production                               |
| $n_{ship}$                 | <b>integer</b>                | Number of ships                              |
| ATF                        | <b>yr<sup>-1</sup></b>        | Annual Time Factor                           |
| UR                         | <b>%/100</b>                  | Utilization Rate                             |
| $(Q_{annual})_o$           | <b>t/yr</b>                   | Oil: Total GEC throughput                    |
| $(Q_{annual})_g$           | <b>t/yr</b>                   | Gas: Total GEC throughput                    |
| $L_{exp}$                  | <b>t</b>                      | Export Loss                                  |
| $L_{ship}$                 | <b>t</b>                      | Shipping Loss                                |
| $L_{imp}$                  | <b>t</b>                      | Import Loss                                  |
| $L_{boil}^{export}$        | <b>%/100day</b>               | Export Boil-off Loss                         |
| $L_{flash}^{export}$       | <b>%/100Q<sub>true</sub></b>  | Export Flash-rate Loss                       |
| $Q_{true}^*$               | <b>t</b>                      | True GEC throughput - $L_{exp}$              |
| $L_{boil}^{ship}$          | <b>%/100day</b>               | Shipping Boil-off Loss                       |
| $t_{transport}$            | <b>day</b>                    | GEC transport time                           |
| $L_{flash}^{ship}$         | <b>%/100Q<sub>true</sub>*</b> | Shipping Flash-rate Loss                     |
| $Q_{true}^{**}$            | <b>t</b>                      | True GEC throughput - ( $L_{exp}+L_{ship}$ ) |
| $L_{boil}^{import}$        | <b>%/100day</b>               | Import Boil-off Loss                         |
| $t_{storgae}$              | <b>day</b>                    | Minimal Storage Time                         |
| $n_{export}$               | <b>integer</b>                | Number of export terminals                   |
| $Cap_{terminal}^{export}$  | <b>t</b>                      | GEC Capacity Export Terminal                 |
| $Cap_{storage}^{ship}$     | <b>t</b>                      | GEC Storage Capacity Ship                    |
| $n_{import}$               | <b>integer</b>                | Number of import terminals                   |
| $Cap_{terminal}^{import}$  | <b>t</b>                      | GEC Capacity Import Terminal                 |

N.B. ...

## Appendix V

In this section, we present the equations essential for computing the devised scoring methods. Equation 15 computes the ETC-score by normalizing the ETC relative to the most expensive GEC. This involves dividing all other ETC values by the highest one, resulting in scores ranging from 0 to 1, where 0 indicates the best performance and 1 indicates the worst.

Similarly, Equations 16 and 17 follow the same methodology, producing three distinct scores also ranging from 0 to 1, where lower values indicate better performance

### Scoring Equations

$$H_{score} = \frac{H_{total}^{points}}{H_{GEC}^{points}} \quad ;[0 \leftrightarrow 1] \quad (Eq.15)$$

$$R_{score} = \frac{R_{total}^{points}}{R_{GEC}^{points}} \quad ;[0 \leftrightarrow 1] \quad (Eq.16)$$

**Table A5.** Score parameters (SII).

| Parameter                                        | Unit                      | Abbreviation/Symbol       |
|--------------------------------------------------|---------------------------|---------------------------|
| Hazard score $\frac{ETC_{highest}}{ETC_{GEC}}$   | -                         | $H_{score}$               |
| Rigidity score $\frac{ETC_{highest}}{ETC_{GEC}}$ | ; $[0 \leftrightarrow 1]$ | $(Eq. 17)$<br>$R_{score}$ |
| Energy Transportation Cost score                 | -                         | $ETC_{score}$             |

### Supplementary Information

<https://www.dropbox.com/scl/fo/xi37gwzwwisim7xnwlhry/AK1zO2eMNpkSgdgpX4AUDSY?rlkey=vqkpiwfxqhbwixz0ja2vb0dgx&dl=0>
